# Supplementary material for: Analysis of Prosthetic Joint Infections Following Invasive Dental Procedures in England
Source: PubMed Central journal article supplement (PMC8771300; doi:10.1001/jamanetworkopen.2021.42987), 2022-01-19
Supplement: jamanetwopen-e2142987-s001.pdf [file jamanetwopen-e2142987-s001.pdf]

## Supplemental Online Content

Thornhill MH, Crum A, Rex S, et al. Analysis of prosthetic joint infections following invasive dental procedures in England. *JAMA Netw Open*. 2022;5(1):e2142987.  
doi:10.1001/jamanetworkopen.2021.42987

**eTable 1.** OPCS-4 Procedure Codes for Joint Replacements

**eTable 2.** Supplementary *ICD-10* Codes to Identify Whether a Causal Organism Was Recorded and the Nature of That Causal Organism

**eFigure 1.** Sensitivity Analysis Using 3-Month, 4-Month and 5-Month Exposure Windows to IDP Before LPJI Admission (Case-Periods) and Different Control Periods in the Case-Crossover Analyses

**eFigure 2.** Monthly Incidence of Different Dental Procedures Before Hip LPJI Admissions

**eFigure 3.** Monthly Incidence of Different Dental Procedures Before Knee LPJI Admissions

**eFigure 4.** Monthly Incidence of Different Dental Procedures Before Other LPJI Admissions

**eFigure 5.** Monthly Incidence of Different Dental Procedures Before Unknown LPJI Admissions

This supplemental material has been provided by the authors to give readers additional information about their work.

**eTable 1.** OPCS-4 Procedure Codes for Joint Replacements

| <b>Code</b> | <b>Procedure</b>                                             |
|-------------|--------------------------------------------------------------|
| W37         | Total prosthetic replacement of hip joint using cement       |
| W38         | Total prosthetic replacement of hip joint not using cement   |
| W39         | Other total prosthetic replacement of hip joint              |
| W40         | Total prosthetic replacement of knee joint using cement      |
| W41         | Total prosthetic replacement of knee joint not using cement  |
| W42         | Other total prosthetic replacement of knee joint             |
| W43         | Total prosthetic replacement of other joint using cement     |
| W44         | Total prosthetic replacement of other joint not using cement |
| W45         | Other total prosthetic replacement of other joint            |
| W46         | Prosthetic replacement of head of femur using cement         |
| W47         | Prosthetic replacement of head of femur not using cement     |
| W48         | Other prosthetic replacement of head of femur                |
| W49         | Prosthetic replacement of head of humerus using cement       |
| W50         | Prosthetic replacement of head of humerus not using cement   |
| W51         | Other prosthetic replacement of head of humerus              |

**eTable 2.** Supplementary *ICD-10* Codes to Identify Whether a Causal Organism Was Recorded and the Nature of That Causal Organism

| Causal Organism                                                                                                   | ICD-10 Codes                                                                                                                                                                                                                                                                                                                                             |
|-------------------------------------------------------------------------------------------------------------------|----------------------------------------------------------------------------------------------------------------------------------------------------------------------------------------------------------------------------------------------------------------------------------------------------------------------------------------------------------|
| (i) Supplementary codes used to identify all LPJI cases where <b>a causal organism</b> was recorded               | <p>B95 (and all sub codes) – Streptococcus and Staphylococcus (as the cause of conditions classified elsewhere)</p> <p>B96 (and all sub codes) – Other specified bacterial agents (as the cause of conditions classified elsewhere)</p>                                                                                                                  |
| (ii) Supplementary codes used to identify those LPJI cases where <b>oral Streptococci</b> were a possible cause   | <p>B95.4 – Other Streptococcus (as the cause of conditions classified elsewhere)</p> <p>B95.5 – Unspecified Streptococcus (as the cause of conditions classified elsewhere)</p>                                                                                                                                                                          |
| (iii) Supplementary codes used to identify those LPJI cases where <b>other Streptococci</b> were a possible cause | <p>B95.0 – Streptococcus grp A (as the cause of conditions classified elsewhere)</p> <p>B95.1 – Streptococcus grp B (as the cause of conditions classified elsewhere)</p> <p>B95.2 – Streptococcus grp D (as the cause of conditions classified elsewhere)</p> <p>B95.3 – Streptococcus pneumoniae (as the cause of conditions classified elsewhere)</p> |
| (iv) Supplementary codes used to identify those LPJI cases where <b>Staphylococci</b> were a possible cause       | <p>B95.6 – Staphylococcus aureus (as the cause of conditions classified elsewhere)</p> <p>B95.7 – Other staphylococcus (as the cause of conditions classified elsewhere)</p> <p>B95.8 – Unspecified staphylococcus (as the cause of conditions classified elsewhere)</p>                                                                                 |

**eFigure 1.** Sensitivity Analysis Using 3-Month, 4-Month and 5-Month Exposure Windows to IDP Before LPJI Admission (Case-Periods) and Different Control Periods in the Case-Crossover Analyses

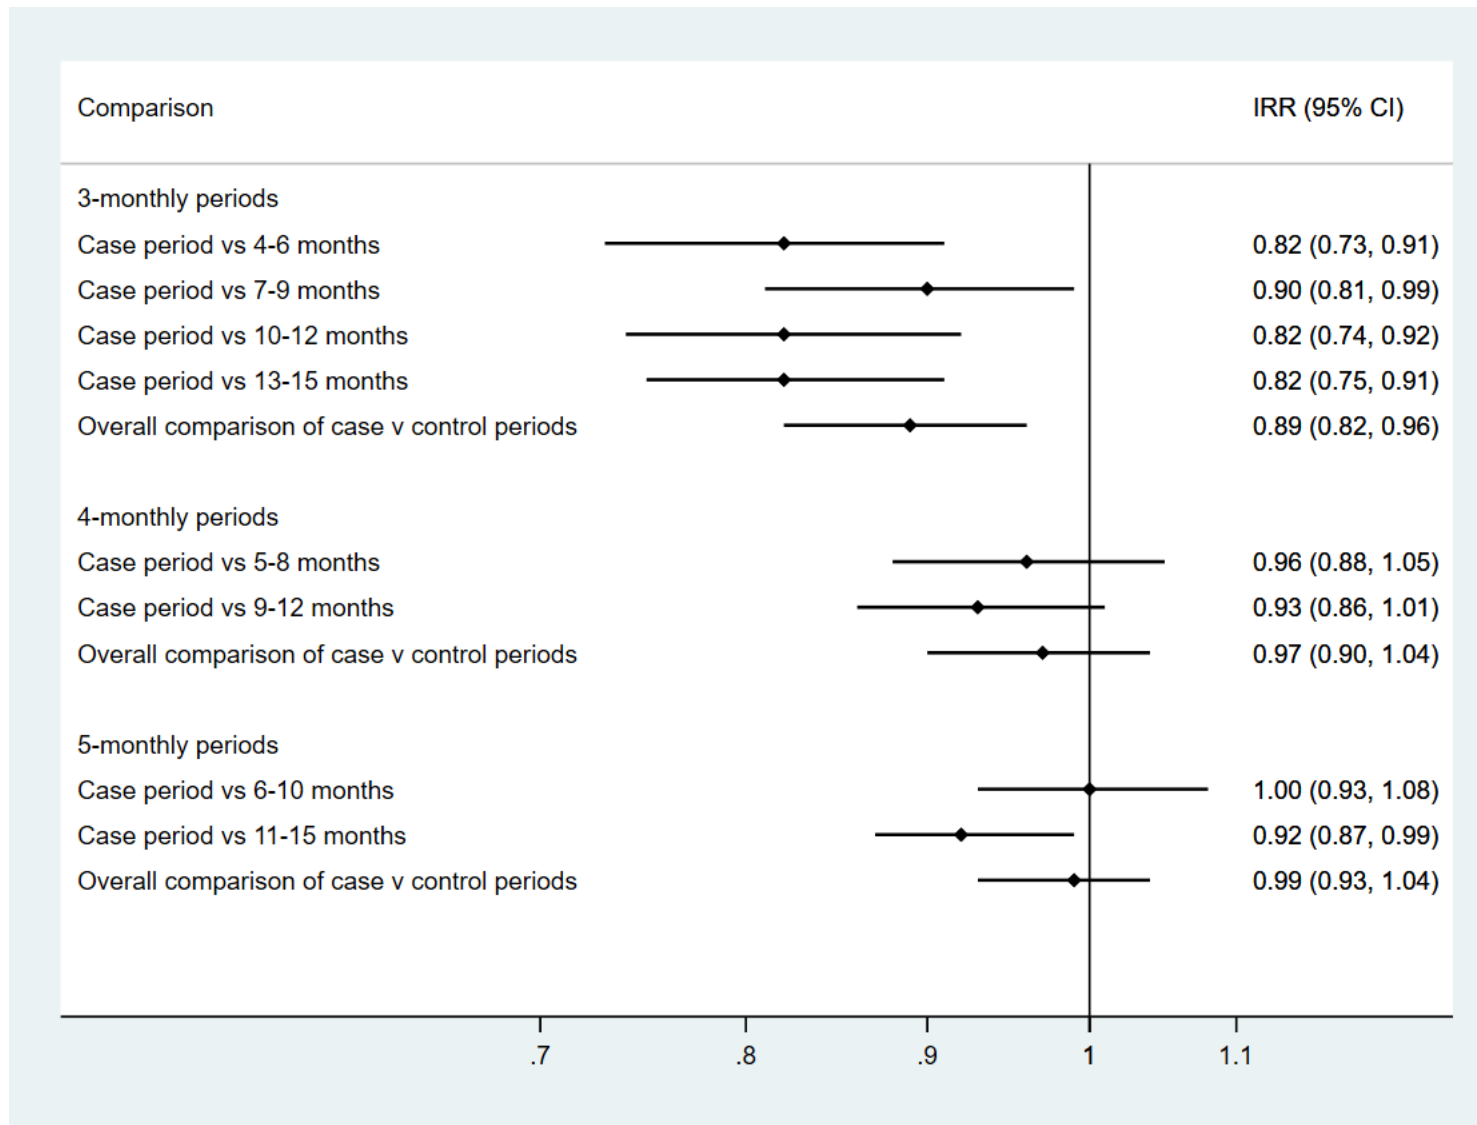

Notes: IDP = Invasive dental procedure, IRR = Incidence Rate Ratio, LPJI = Late prosthetic joint infection.

**eFigure 2.** Monthly Incidence of Different Dental Procedures Before Hip LPJI Admissions

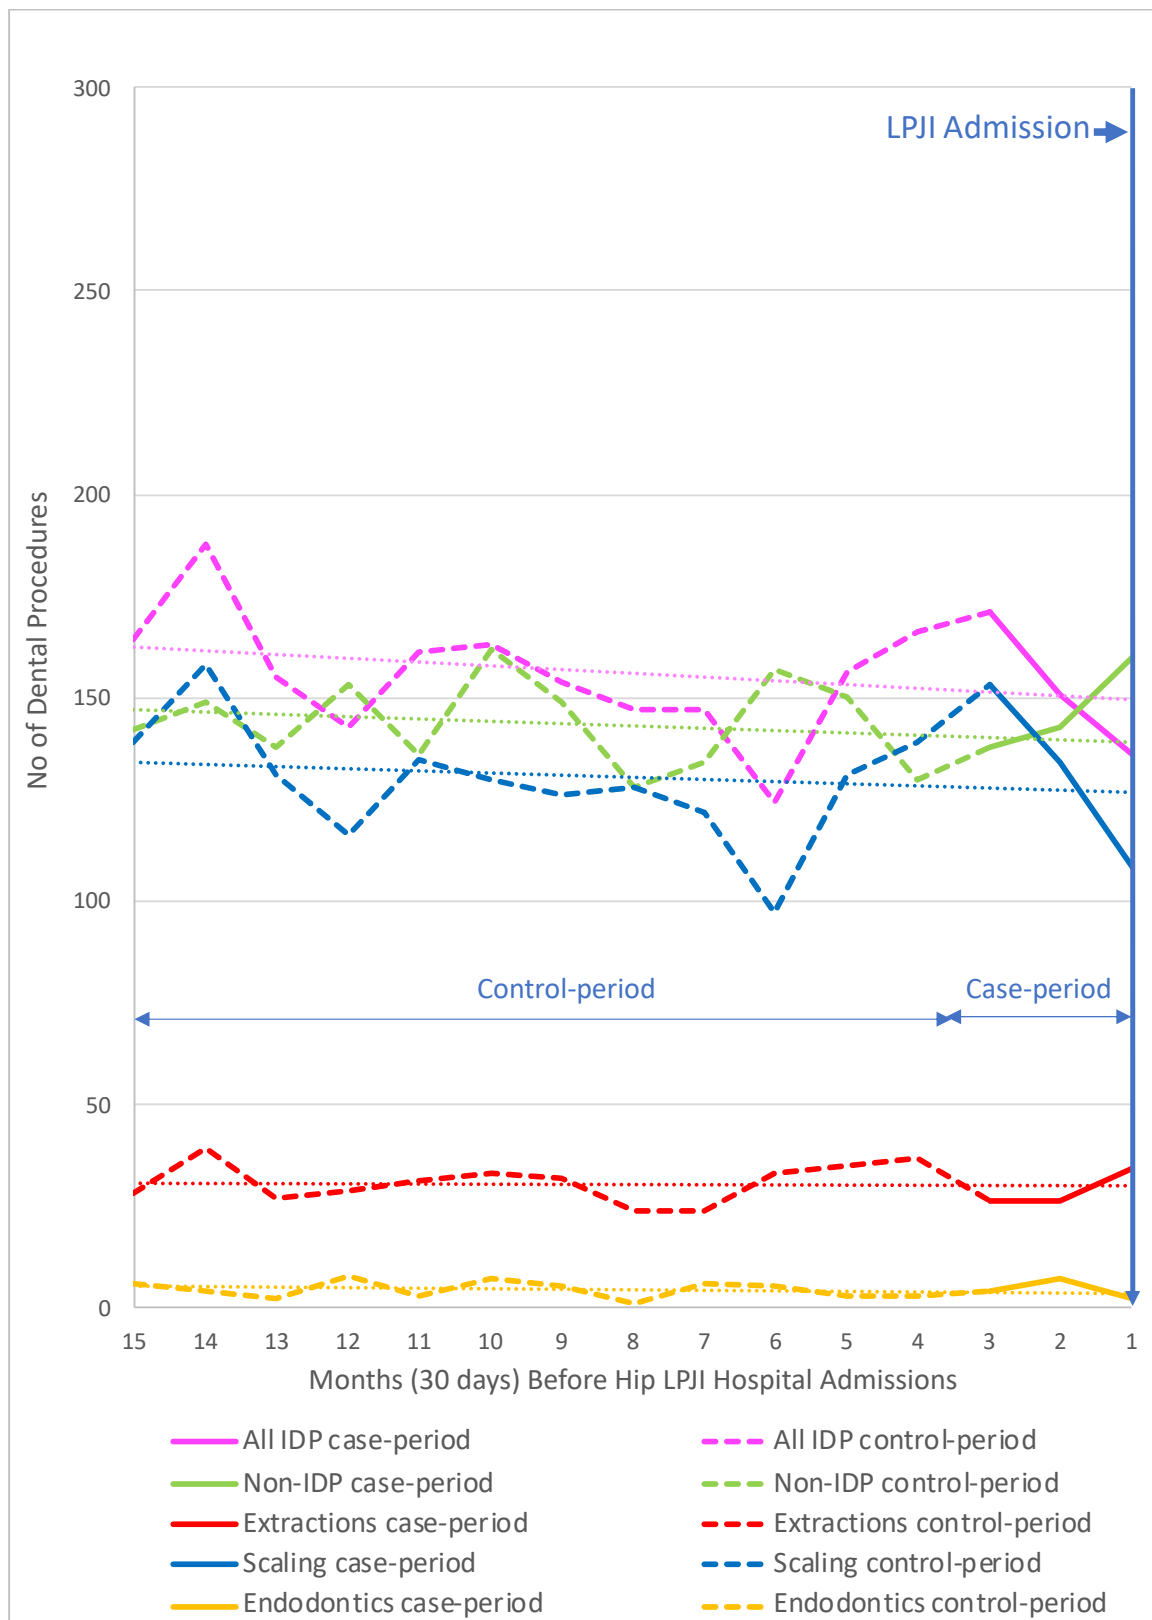

Notes: Solid lines show the monthly incidence of dental procedures during the 3-month case period immediately before IE-admission. Dashed lines show monthly incidence of procedures during the 12-month control period (months 4-15). Dotted line shows the control period trend (extended into the case-period for comparison). LPJI = Late prosthetic joint infection, IDP = Invasive dental procedure.

**eFigure 3.** Monthly Incidence of Different Dental Procedures Before Knee LPJI Admissions

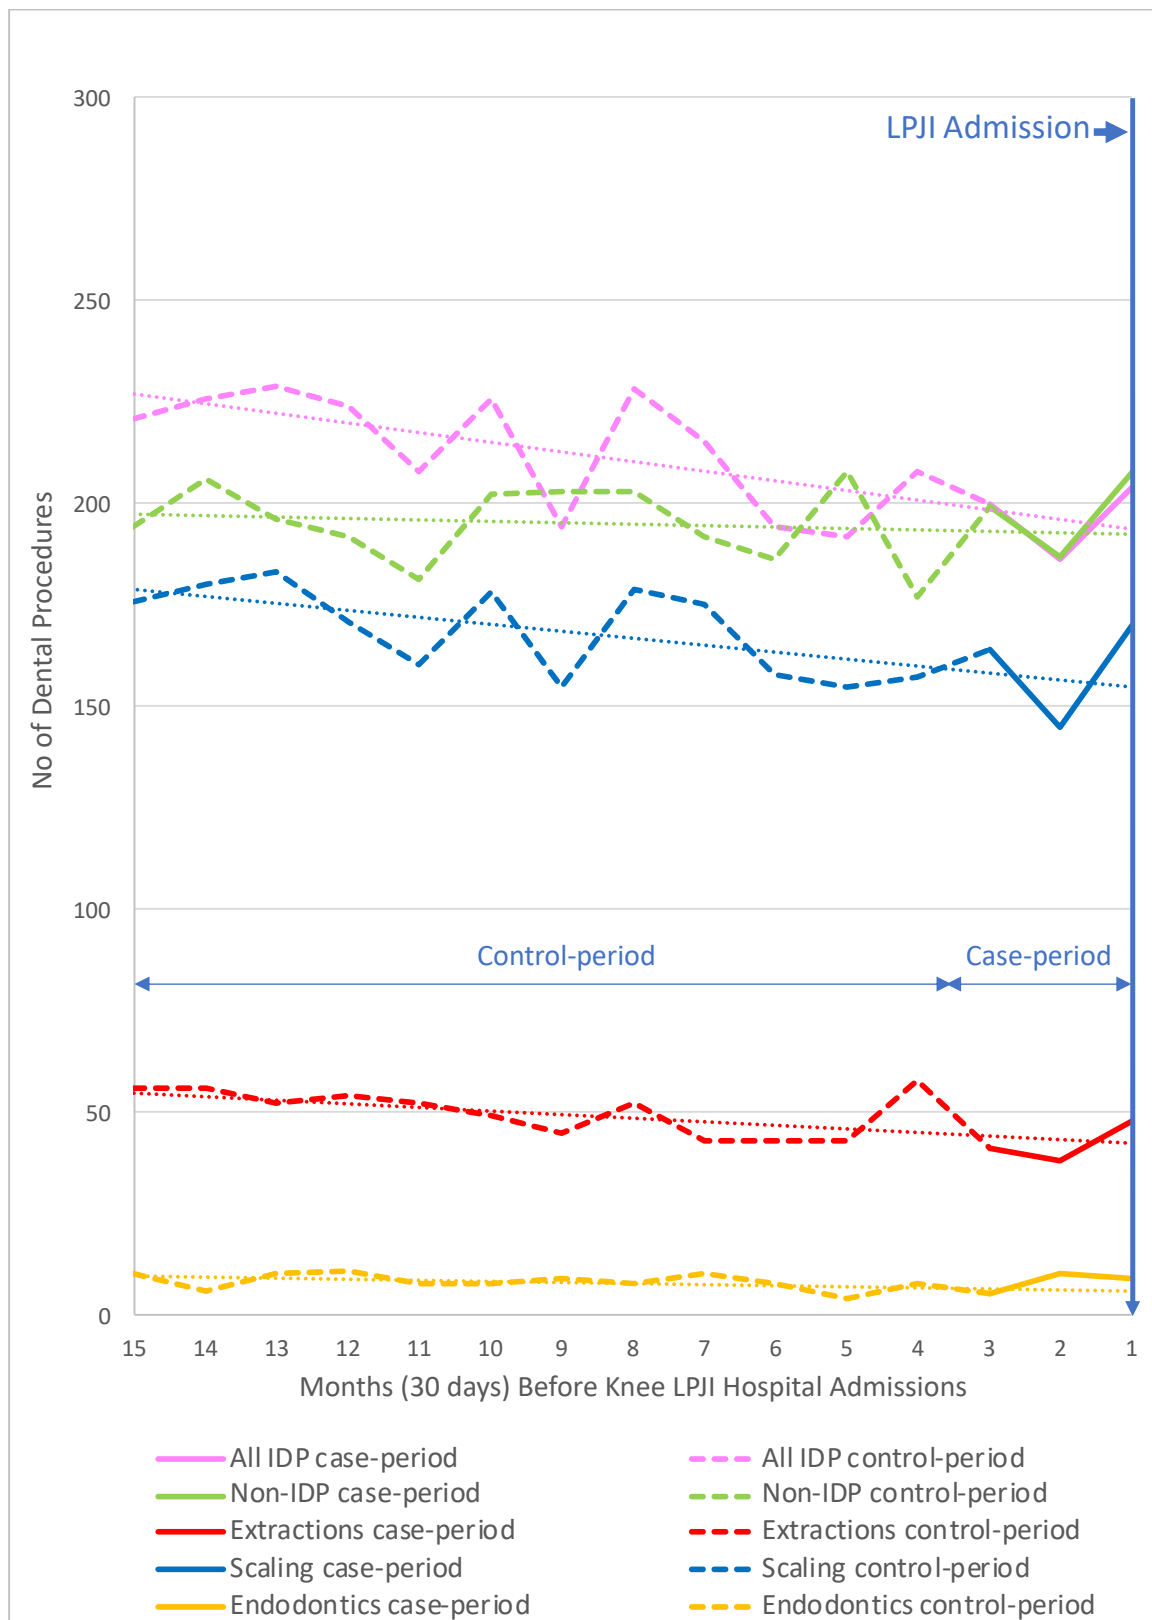

Notes: Solid lines show the monthly incidence of dental procedures during the 3-month case period immediately before IE-admission. Dashed lines show monthly incidence of procedures during the 12-month control period (months 4-15). Dotted line shows the control period trend (extended into the case-period for comparison). LPJI = Late prosthetic joint infection, IDP = Invasive dental procedure.

**eFigure 4.** Monthly Incidence of Different Dental Procedures Before Other LPJI Admissions

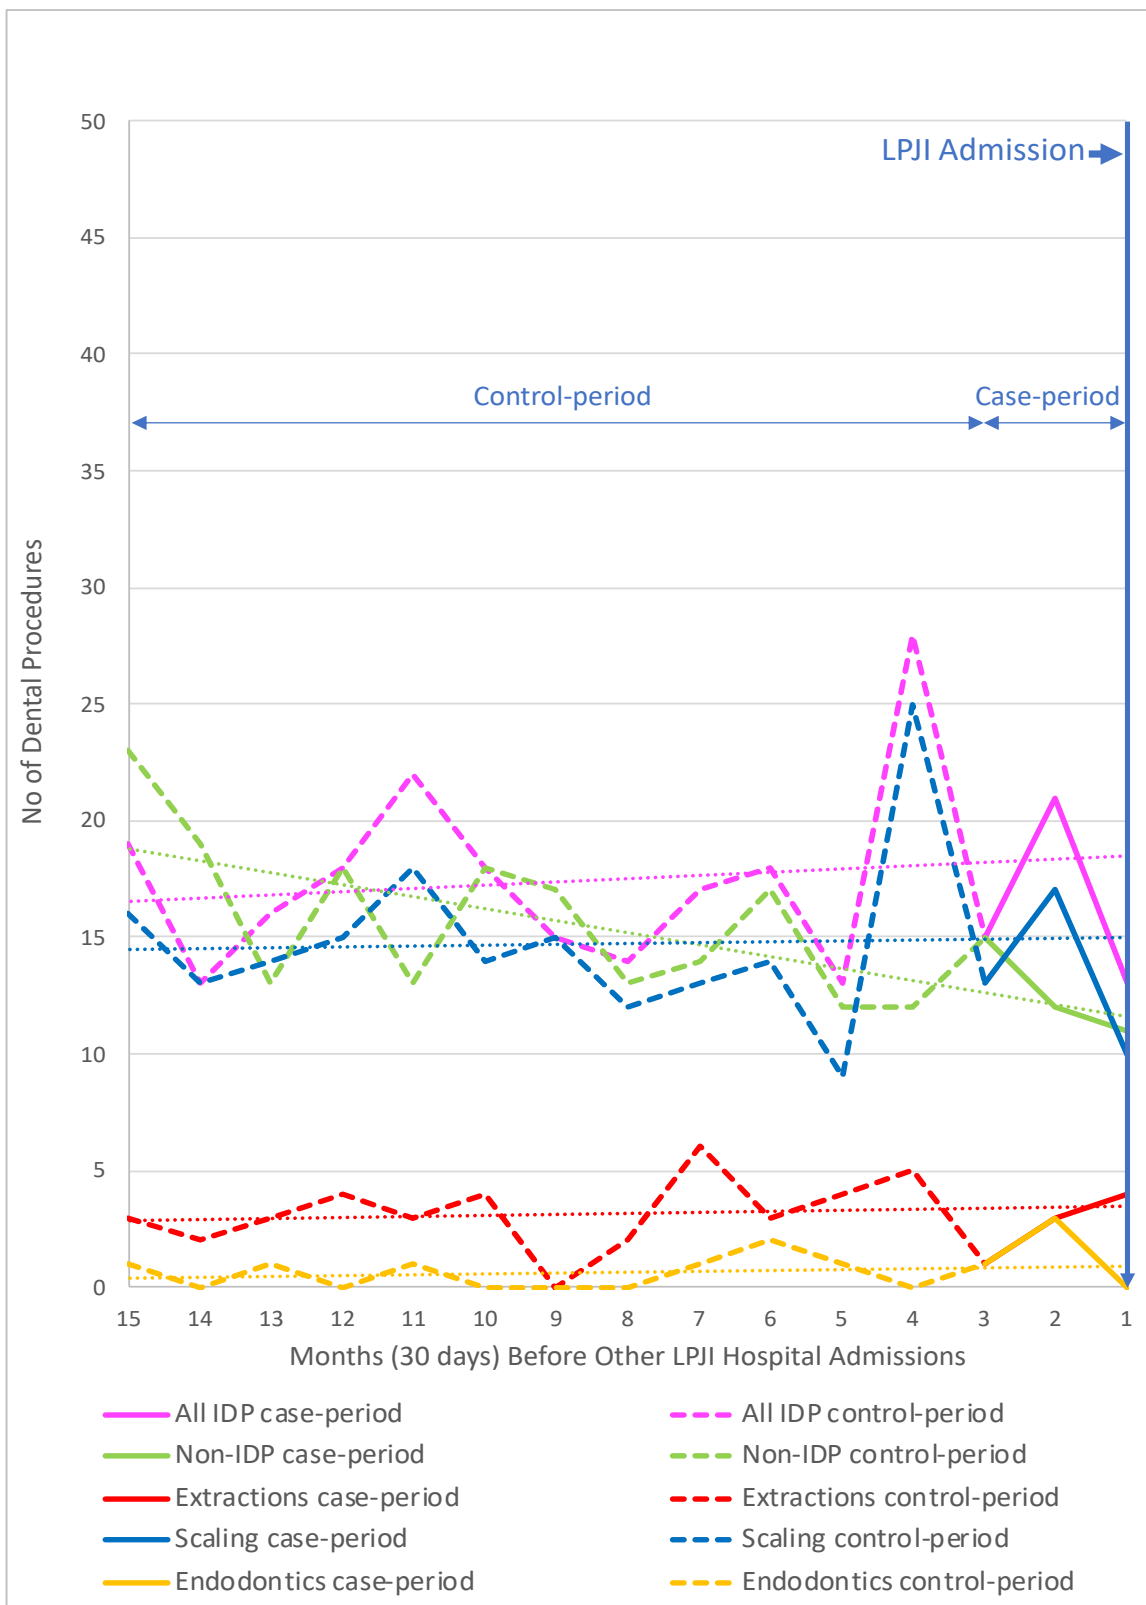

Notes: Solid lines show the monthly incidence of dental procedures during the 3-month case period immediately before IE-admission. Dashed lines show monthly incidence of procedures during the 12-month control period (months 4-15). Dotted line shows the control period trend (extended into the case-period for comparison). LPJI = Late prosthetic joint infection, IDP = Invasive dental procedure.

**eFigure 5.** Monthly Incidence of Different Dental Procedures Before Unknown LPJI Admissions

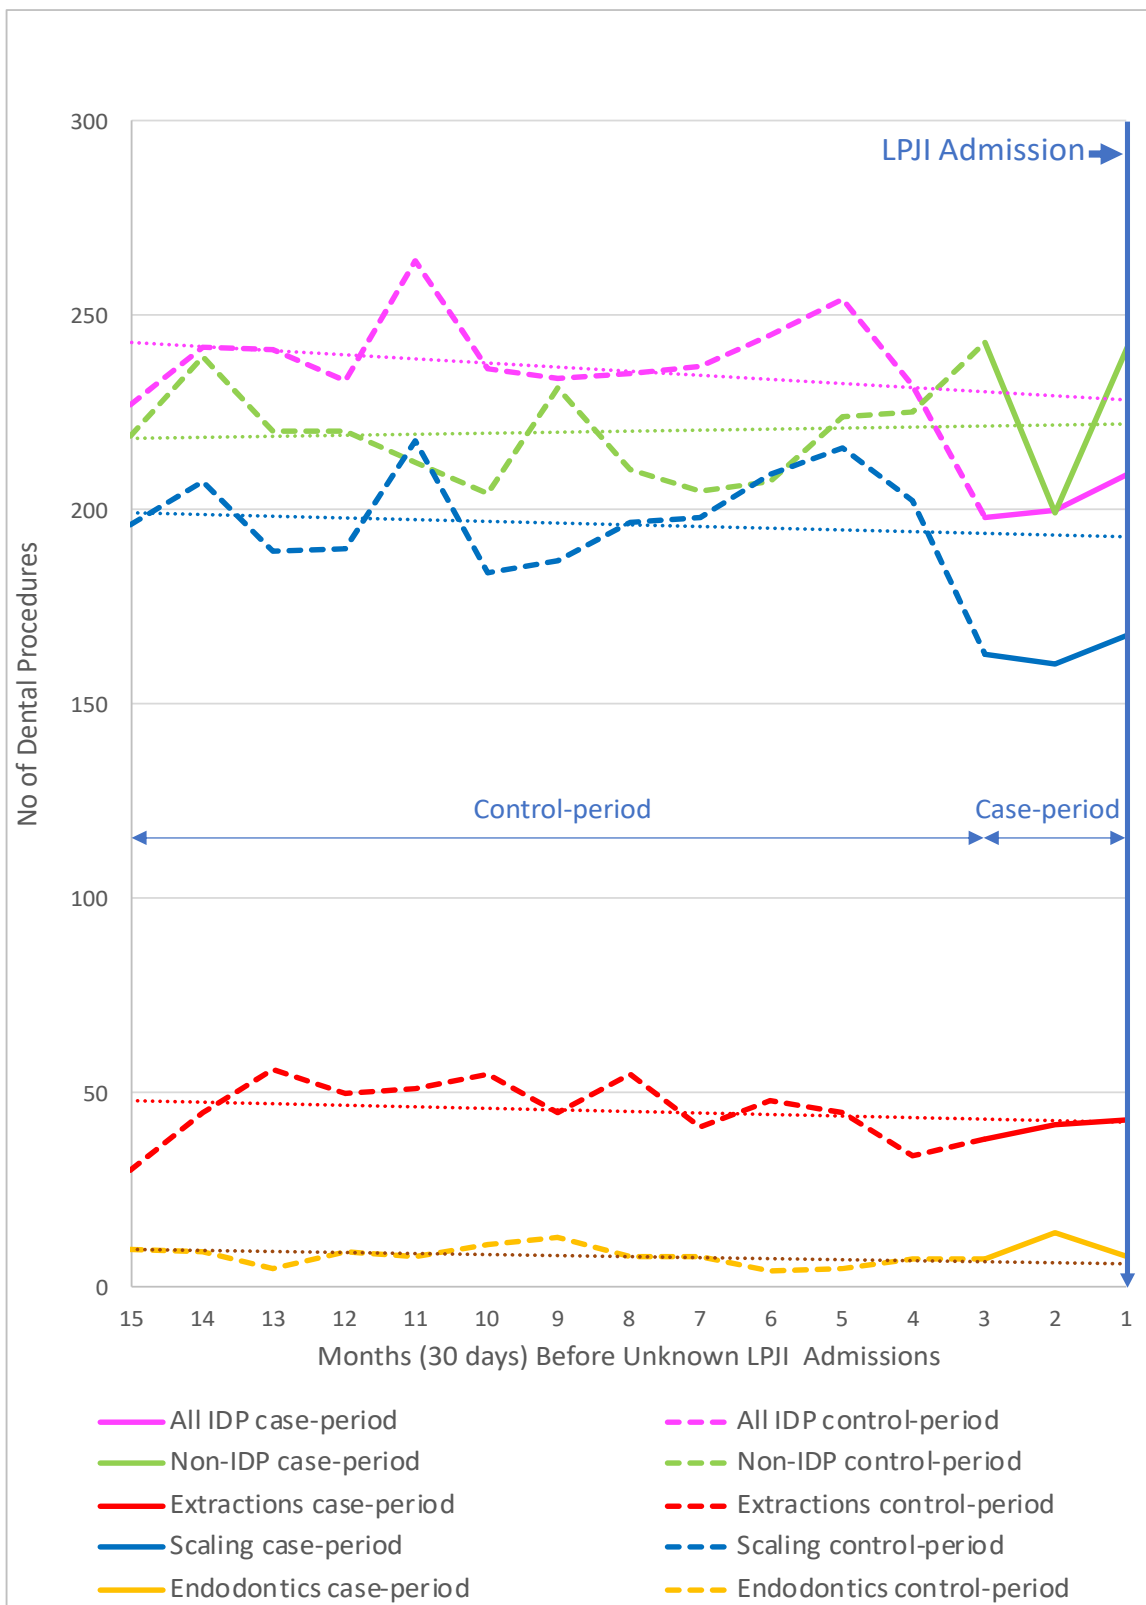

Notes: Solid lines show the monthly incidence of dental procedures during the 3-month case period immediately before IE-admission. Dashed lines show monthly incidence of procedures during the 12-month control period (months 4-15). Dotted line shows the control period trend (extended into the case-period for comparison). LPJI = Late prosthetic joint infection, IDP = Invasive dental procedure.
